# Supplementary material
Source: PubMed Central journal article supplement (PMC5998811)
Supplement: NIHMS938907-supplement-supplement_1.pdf [file NIHMS938907-supplement-supplement_1.pdf]

# Little Cigars vs 3R4F Cigarette: Physical Properties and HPHC Yields

## Supporting Information

### Tables

**Table SI1**  
**The Physical and Chemical Properties Measured for the 3R4F Reference Cigarette**  
**(Average ± Standard Error) Compared to Previously Published Results**

|                                                       |            | Current Study (N = 4) | Previous Studies <sup>1-4</sup> |
|-------------------------------------------------------|------------|-----------------------|---------------------------------|
| <i>Physical Properties</i>                            |            |                       |                                 |
| <b>Tobacco Mass (mg)</b>                              |            | 753 ± 10              | 760-775                         |
| <b>Consumed Tobacco (mg)</b>                          | <b>ISO</b> | 579 ± 5               | 620 <sup>a</sup>                |
|                                                       | <b>CIR</b> | 568 ± 9               | NA <sup>b</sup>                 |
| <b>TPM (mg)</b>                                       | <b>ISO</b> | 7.3 ± 0.3             | 9.5 ± 0.4                       |
|                                                       | <b>CIR</b> | 31.9 ± 1.3            | 44.1 ± 1.4                      |
| <b>Puff Number (N)</b>                                | <b>ISO</b> | 7.0 ± 0.0             | 7.9 -10                         |
|                                                       | <b>CIR</b> | 9.0 ± 0.0             | 10.4 -10.7                      |
| <b>Circumference (mm)</b>                             |            | 24.5 ± 0.1            | 24.5                            |
| <b>Length (mm)</b>                                    |            | 83.9 ± 0.2            | 84.0                            |
| <b>Filter Length (mm)</b>                             |            | 26.7 ± 0.0            | NA                              |
| <i>Semivolatile HPHCs per mass of TPM<sup>1</sup></i> |            |                       |                                 |
| <b>NNN (ng/mg)</b>                                    | <b>ISO</b> | 14.3 ± 1.1            | 11.4 ± 1.3                      |
|                                                       | <b>CIR</b> | 9.2 ± 0.5             | 7.1 ± 1.1                       |
| <b>NNK (ng/mg)</b>                                    | <b>ISO</b> | 11.9 ± 1.0            | 10.4 ± 1.2                      |
|                                                       | <b>CIR</b> | 8.7 ± 0.5             | 7.0 ± 1.1                       |
| <b>BaP (ng/mg)</b>                                    | <b>ISO</b> | 0.8 ± 0.1             | 0.6 ± 1.4                       |
|                                                       | <b>CIR</b> | 0.4 ± 0.02            | 0.3 ± 1.4                       |
| <b>Nicotine (µg/mg)</b>                               | <b>ISO</b> | 80.7 ± 5.1            | 76.8 ± 1.8                      |
|                                                       | <b>CIR</b> | 55.9 ± 2.9            | 44.7 ± 1.9                      |

Note.

a = At puff number: 8 puff; b = NA: Data not available

### Supplemental References

1. Eldridge A, Betson TR, Gama MV, McAdam K. Variation in tobacco and mainstream smoke toxicant yields from selected commercial cigarette products. *Regul Toxicol Pharmacol.* 2015;71:409–427.
2. Roemer E, Schramke H, Weiler H, Wittke S. Mainstream smoke chemistry and in vitro and in vivo toxicity of the reference cigarettes 3R4F and 2R4F. *Beiträge zur Tabakforschung International (Contributions to Tobacco Research).* 2012;25(1):316–335.
3. Marcilla A, Beltran MI, Gómez-Siurana A, et al. Comparison between the mainstream smoke of eleven RYO tobacco brands and the reference tobacco 3R4F. *Toxicol Rep.* 2014;1:122–136.
4. Kentucky Tobacco Research and Development Center. 3R4F Preliminary Analysis. Available at: <https://ctrp.uky.edu/resources/pdf/webdocs/3R4F%20Preliminary%20Analysis.pdf>. Accessed June 25, 2017.

**Table SI2**  
**Chemical Constituent Yields Normalized to Nicotine Yield (Average ± Standard Error) in the Mainstream Smoke of the Little Cigars and the Reference Cigarette (3R4F) Using ISO and CIR Smoking Regimens**

|                                    | NNN                  | NNK           | Menthol         | BaP           | NNN           | NNK           | Menthol         | BaP           |
|------------------------------------|----------------------|---------------|-----------------|---------------|---------------|---------------|-----------------|---------------|
|                                    | ng/μg N <sup>a</sup> | ng/μg N       | μg/μg N         | ng/μg N       | ng/μg N       | ng/μg N       | μg/μg N         | ng/μg N       |
|                                    | ISO                  |               |                 |               | CIR           |               |                 |               |
| <b>Cheyenne Full Flavor</b>        | 0.305 ± 0.012        | 0.319 ± 0.018 | ND <sup>b</sup> | 0.022 ± 0.001 | 0.327 ± 0.022 | 0.329 ± 0.031 | 0.008 ± 0.000   | 0.023 ± 0.002 |
| <b>Cheyenne Menthol</b>            | 0.282 ± 0.017        | 0.215 ± 0.013 | 0.797 ± 0.053   | 0.016 ± 0.001 | 0.282 ± 0.010 | 0.218 ± 0.015 | 0.772 ± 0.051   | 0.013 ± 0.001 |
| <b>Swisher Sweets Original</b>     | 1.004 ± 0.053        | 0.610 ± 0.031 | ND <sup>b</sup> | 0.011 ± 0.001 | 1.017 ± 0.065 | 0.651 ± 0.043 | 0.010 ± 0.001   | 0.011 ± 0.001 |
| <b>Swisher Sweets Sweet Cherry</b> | 0.469 ± 0.024        | 0.360 ± 0.025 | ND <sup>b</sup> | 0.015 ± 0.001 | 0.471 ± 0.014 | 0.398 ± 0.015 | ND <sup>b</sup> | 0.013 ± 0.001 |
| <b>3R4F</b>                        | 0.178 ± 0.014        | 0.148 ± 0.013 | ND <sup>b</sup> | 0.010 ± 0.001 | 0.164 ± 0.007 | 0.155 ± 0.008 | ND <sup>b</sup> | 0.007 ± 0.000 |

Note.  
a = N: Nicotine; b = ND: Not detected

**Table SI3**  
**Thickness Measurements of the Paper Wrapper of the 3R4F Reference Cigarette and the Selected Little Cigars in Centimeters (cm)**

| Product                       | Thickness in cm   |                   |                                   |                              |
|-------------------------------|-------------------|-------------------|-----------------------------------|------------------------------|
|                               | Maximum Thickness | Minimum Thickness | The Thickness of the Folded Paper | Average ± Std. Error (N = 3) |
| <b>3R4F</b>                   | 0.0097            | 0.0097            | -                                 | 0.0097 ± 0.000               |
| <b>Cheyenne Full Flavor</b>   | 0.0127            | 0.0114            | 0.0224                            | 0.0155 ± 0.004               |
| <b>Cheyenne Menthol</b>       | 0.0157            | 0.0127            | 0.0224                            | 0.0169 ± 0.003               |
| <b>Swisher Sweet Original</b> | 0.0132            | 0.0102            | 0.0163                            | 0.0132 ± 0.002               |
| <b>Swisher Sweet Cherry</b>   | 0.0102            | 0.0102            | 0.0150                            | 0.0118 ± 0.002               |

## Figures

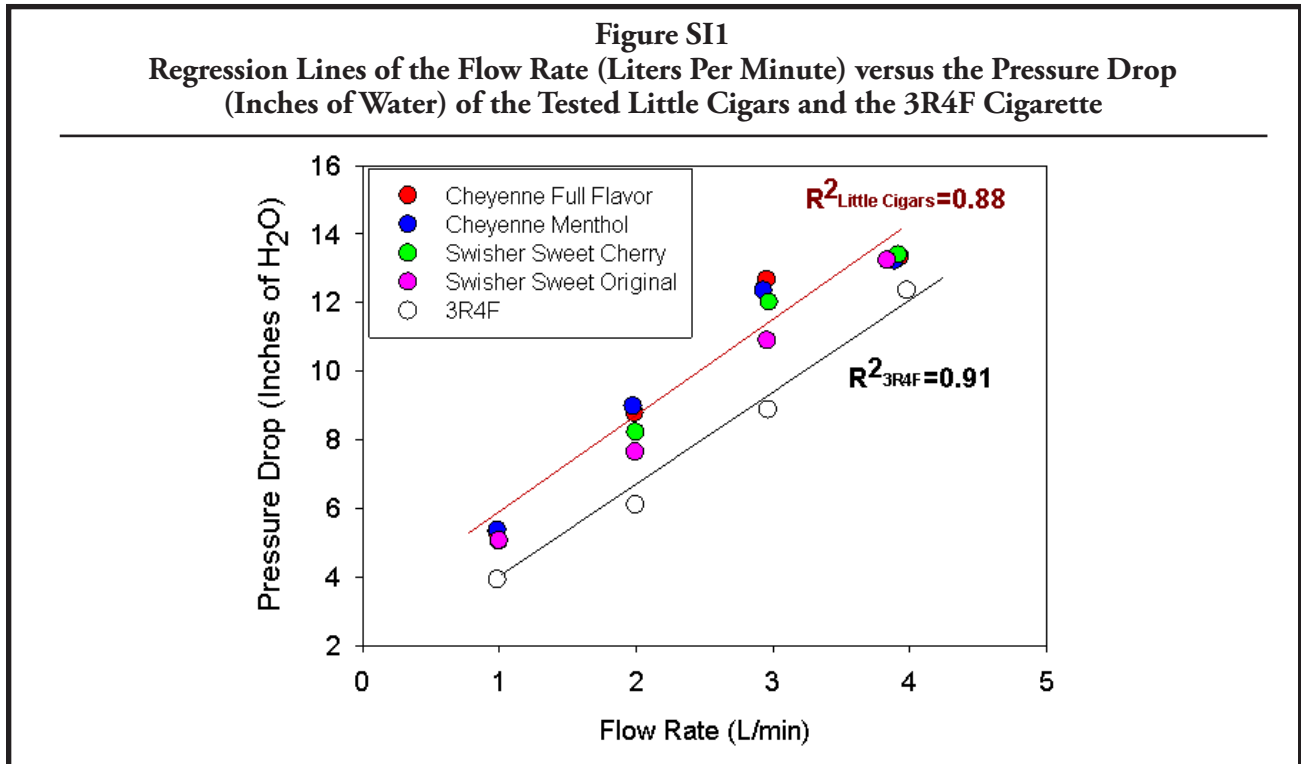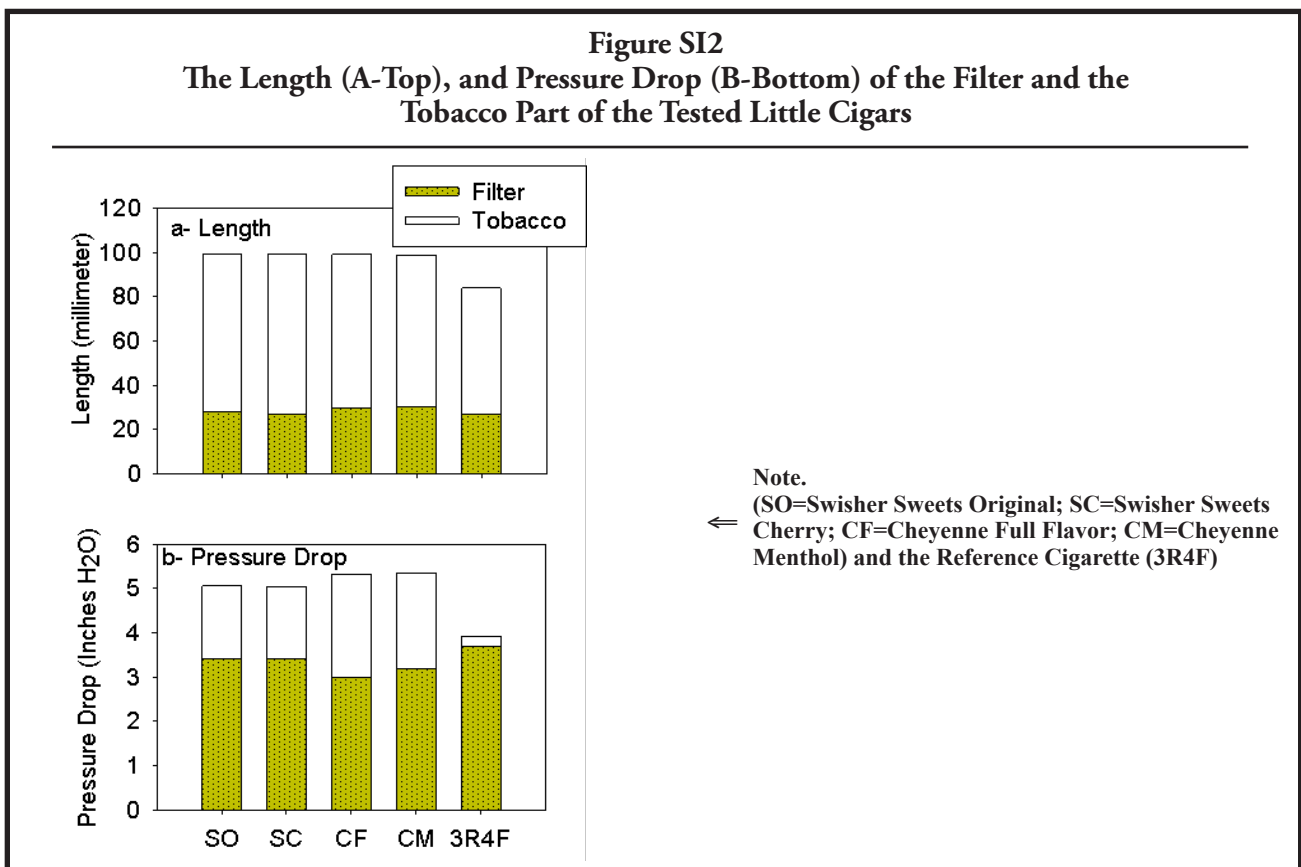

**Figure SI3**  
**Percentage of Nicotine per Mass of Total Particulate Matter (TPM) in the Selected Little Cigars**

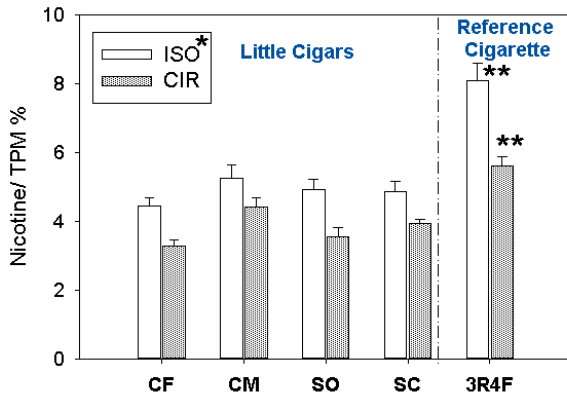

**Note.**  
 (CF = Cheyenne Full Flavor; CM = Cheyenne Menthol; SO = Swisher Sweets Original; SC = Swisher Sweets Cherry) and reference cigarette (3R4F) based on CIR and ISO smoking machine regimens; [\*] Significant difference was found between ISO and CIR across all products ( $p < .05$ ); [\*\*] Significant difference was found between the 3R4F and the little cigars when using CIR ( $p < .01$ ) and ISO ( $p < .001$ ) smoking regimens.

**Figure SI4**  
**A Snapshot of the Tobacco Texture for the 3R4F Reference Cigarette and the Selected Little Cigars**

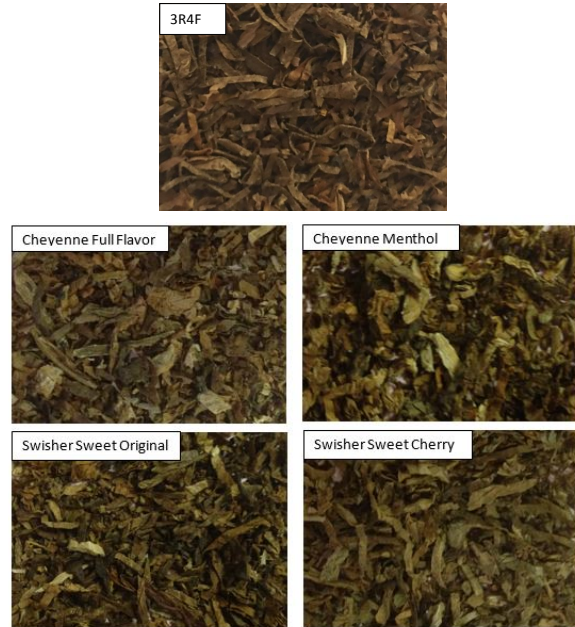

**Figure SI5**  
**A Snapshot of the Upper Side of the 3R4F Reference Cigarette and Little Cigars Filter Paper**

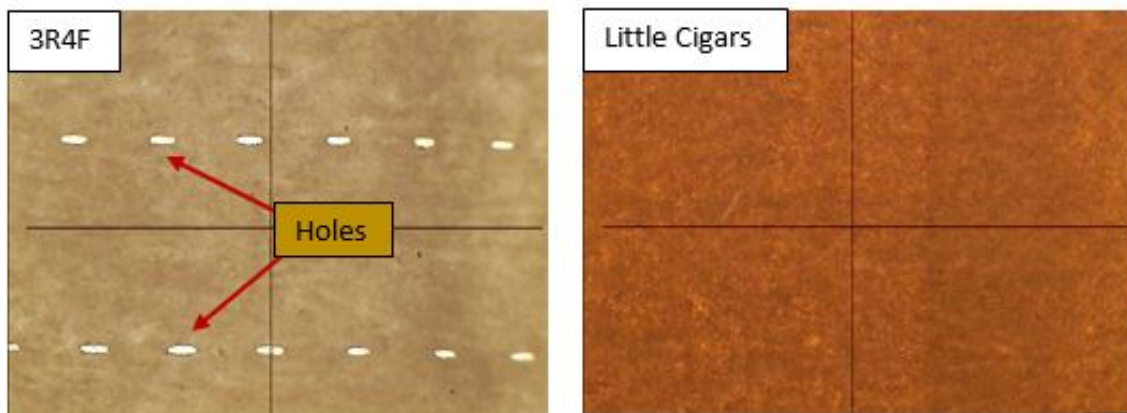

**Note.**  
 Ventilation holes measure (average  $\pm$  standard error)  $0.016 \pm 0.001$  cm in length and  $0.007 \pm 0.0002$  cm in width.

**Figure SI6**  
**A Snapshot of the 3R4F Reference Cigarette and Selected Little Cigars Filters after Machine Smoking (ISO Puffing)**

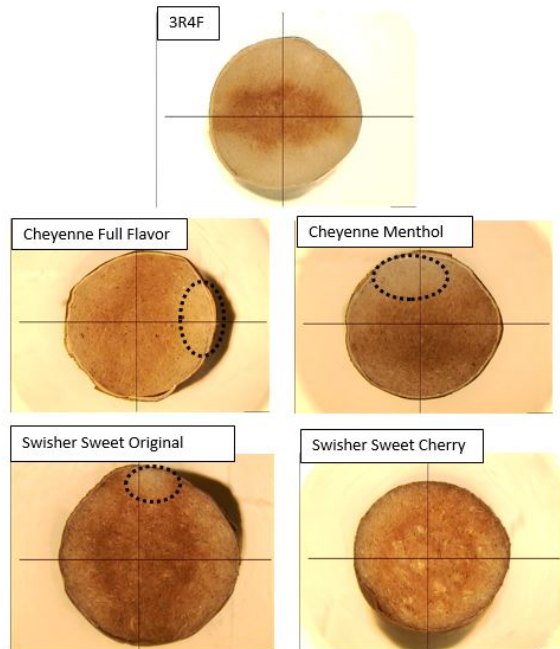

**Note.**  
 The section shows the close-to-mouth filter; the dotted circles show the light parts of the filter in little cigars.

**Figure SI7**  
**A Mid-cross Section of the Filter Part of the 3R4F Reference Cigarette and Selected Little Cigars after Machine Smoking (ISO Puffing)**

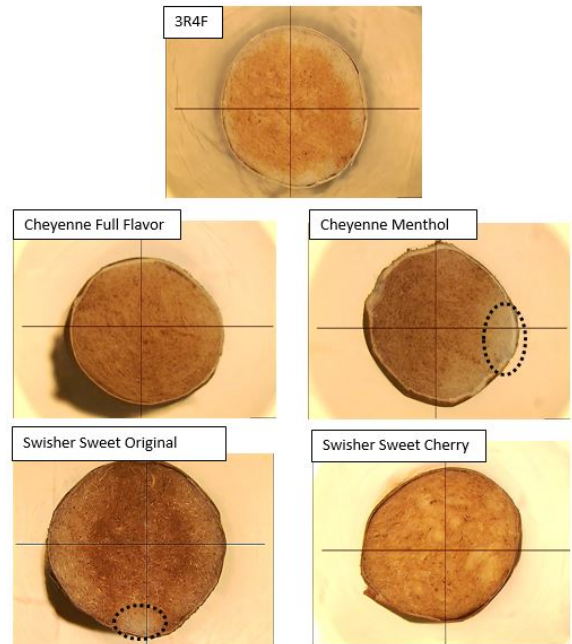

**Note.**  
 The dotted circles show the light parts of the filter in little cigars

**Figure SI8**  
**Longitudinal Section of the 3R4F Reference Cigarette and Selected Little Cigars Filters after Machine Smoking (ISO Puffing)**

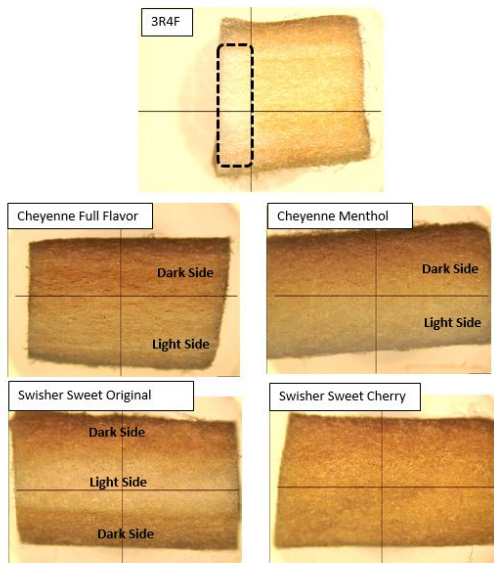

**Note.**  
 ← The dotted square shows the light part of the filter in the reference cigarette.

**Figure SI9**  
**An Inner View of the Filter Paper of the Selected Little Cigars**

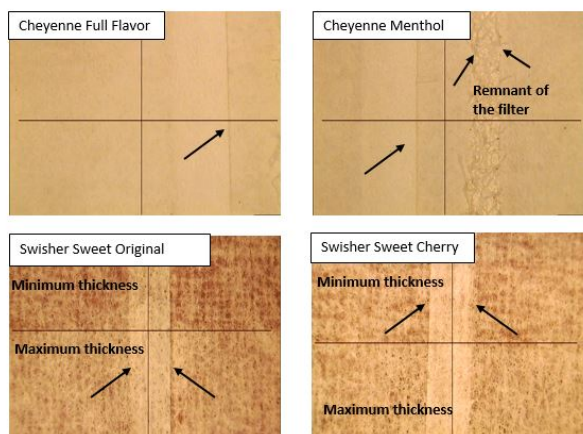

**Note.**  
The arrows refer to the over folded paper (the thickest part of the filter); the 3R4F reference cigarette showed uniform paper with 2 lines of holes around the filter (not shown here).

**Figure SI10**  
**An Inner Snapshot of the Paper Wrapper of Cheyenne and Swisher Sweet**

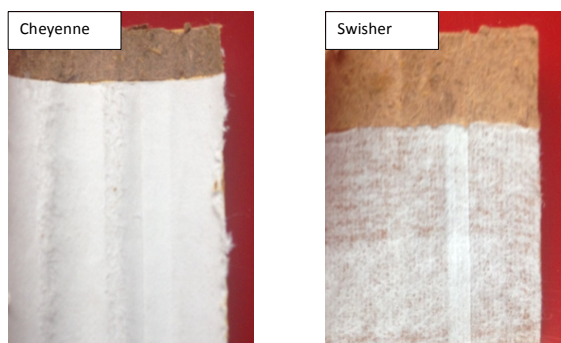

**Note.**  
The white portion is an additional inner paper that wrapped the little cigar tobacco.
